# Supplementary material for: Recovery From Disability for Individuals With Borderline Personality Disorder: A Feasibility Trial of DBT-ACES
Source: Atypon-hosted journal article supplement (doi:10.1176/ps.2010.61.11.1106), 2010-11-01

Figure 1

CONSORT flowchart of study recruitment and completion of DBT-ACES for persons severely impaired by borderline personality disorder<sup>a</sup>

<sup>a</sup> DBT-ACES, dialectical behavior therapy–Accepting the Challenges of Exiting the System; SDBT, standard DBT

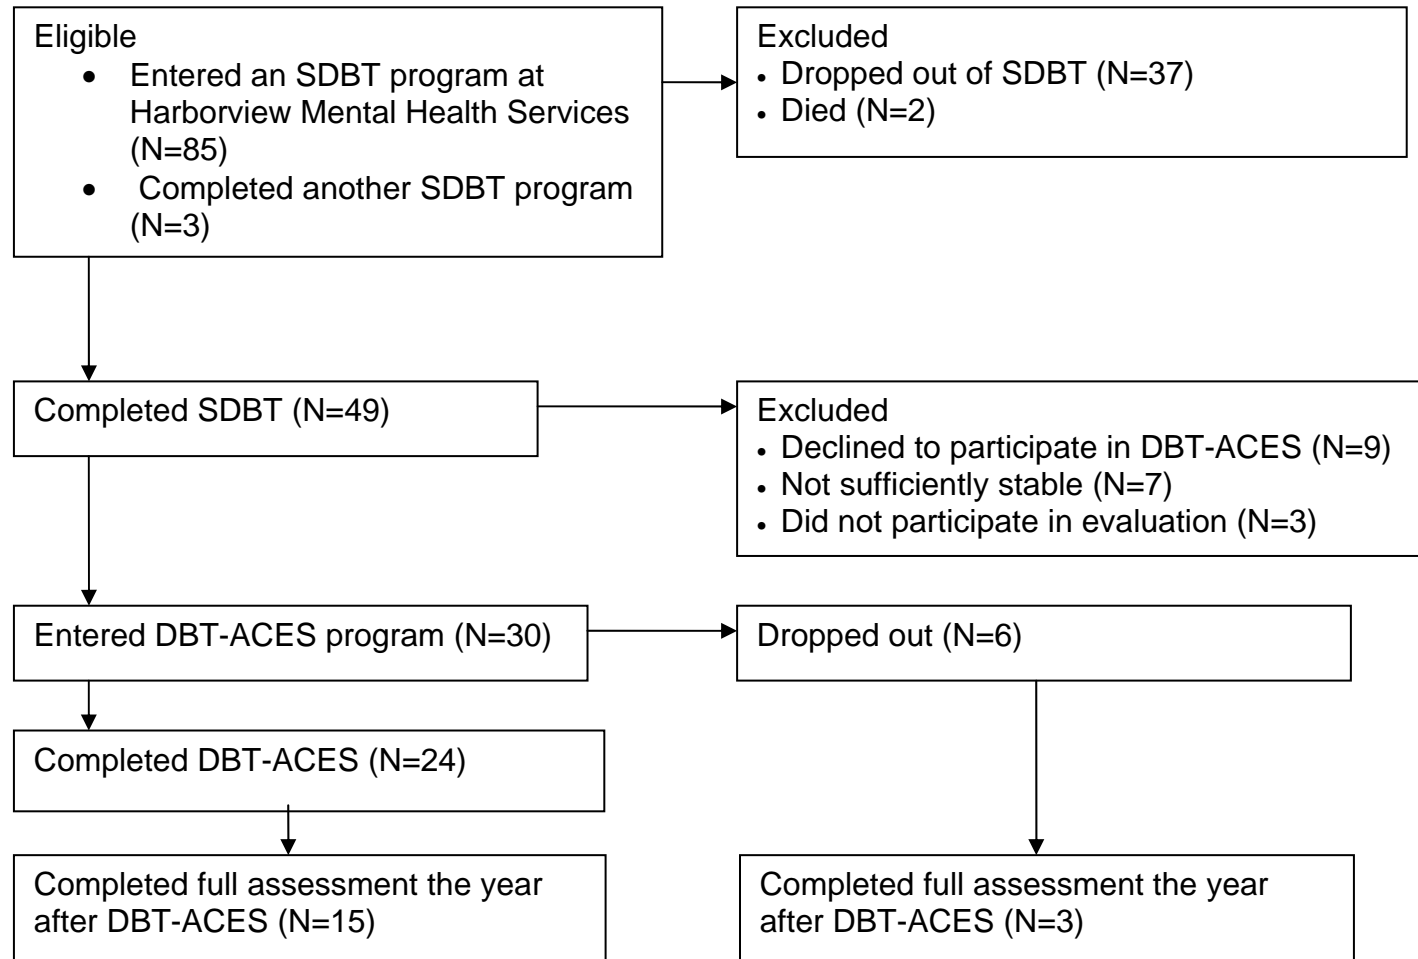

Supplement: pss_61_11_1106_01.pdf [file pss_61_11_1106_01.pdf]
